# Supplementary material for: Red-emissive carbon nanostructure-anchored molecularly imprinted Er-BTC MOF: a biosensor for visual anthrax monitoring
Source: Royal Society of Chemistry journal article supplement (doi:10.1039/d3an00865g), 2023-01-01
Supplement: d3an00865g1.pdf [file d3an00865g1.pdf]

## Supplementary Material for:

### **Red Emissive Carbon Nanostructure-Anchored Molecularly Imprinted Er-BTC MOF: A Biosensor for Visual Anthrax Monitoring**

Solmaz Norouzi, Kheibar Dashtian, Fereshteh Amourizi, Rouholah Zare Dorabei\*

*Research Laboratory of Spectrometry & Micro and Nano Extraction, Department of Chemistry, Iran*

*University of Science and Technology, Tehran 16846-13114, Iran*

\* **Corresponding author:** E-mail address: zaredorabei@iust.ac.ir (Rouholah Zare-Dorabei)

Tel: +98 21 77240646 & Fax: +98 21 77491204

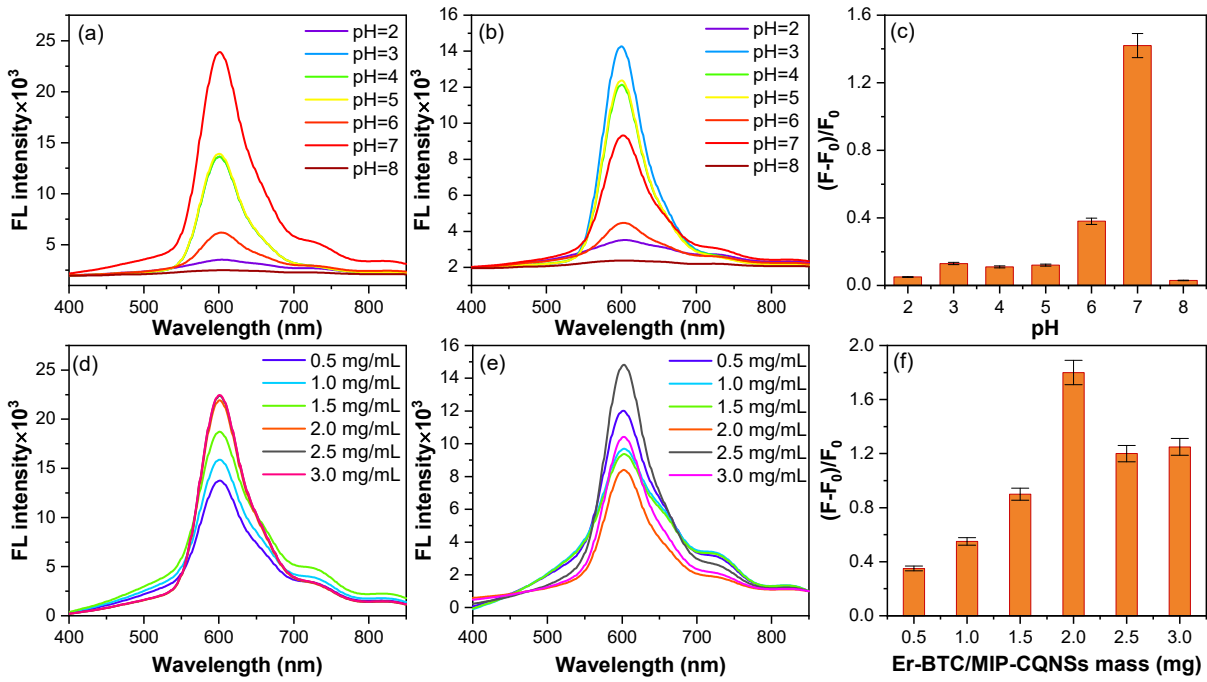

**Fig. S1.** Fluorescence spectra of the probe in the absence and presence of DPA (80  $\mu$ M) at different pH values (a and b), and fluorescence spectra of the probe at different dosages of Er-BTC-MOF/MIP-r-QCNSs in the absence and presence of DPA (d and e) and the corresponding fluorescence ratios to the blank signal (c and f).

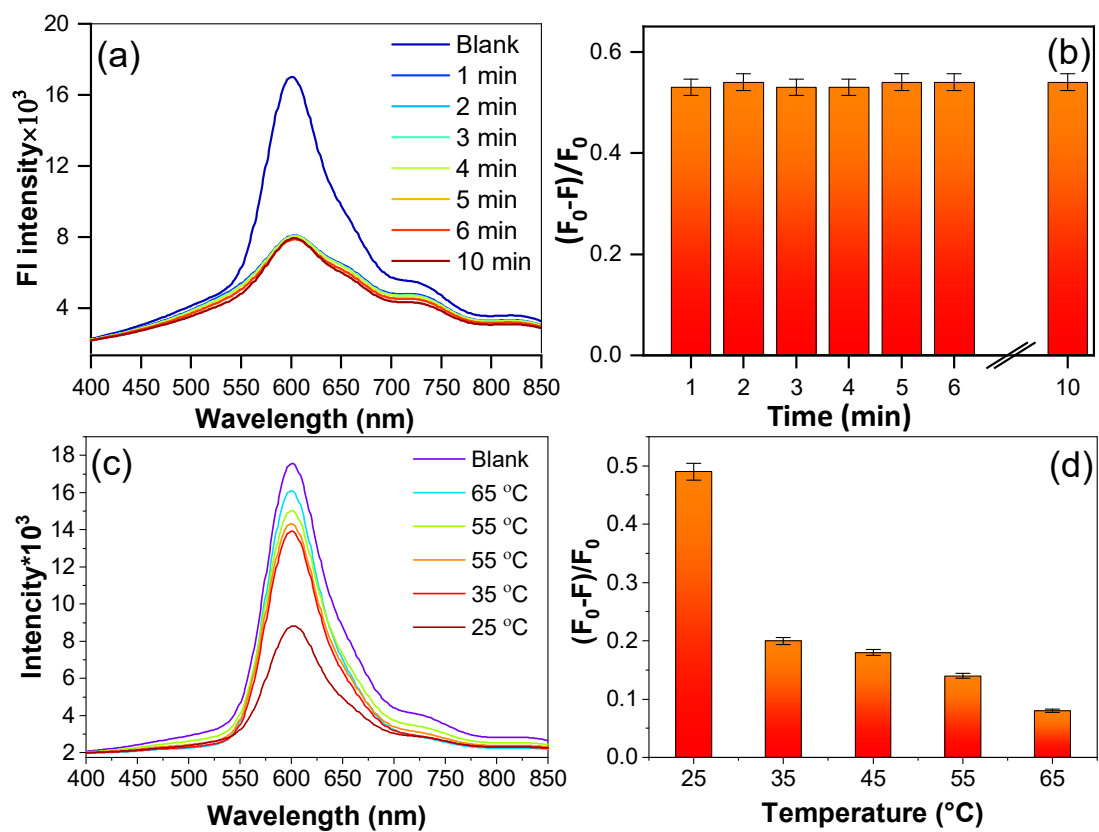

Fig. S2. Fluorescence spectra of Er-BTC-MOF/MIP-r-QCNSs in the presence of DPA (80  $\mu$ M) at different times (pH=7, PBS) (a) and temperatures (pH=7, PBS, assay time=1 min) (c), and the corresponding fluorescence ratios to the blank signal (b and d).

**Table S1.** The various concentration of dipicolinic acid in urine and well water samples and the calculated results

| Real sample | Added Concentration ( $\mu\text{M}$ ) | Detected Concentration ( $\mu\text{M}$ ) | Recovery (%) | RSD (n=3) |
|-------------|---------------------------------------|------------------------------------------|--------------|-----------|
| Urine       | 0                                     | 2.45                                     | -            | 3.49      |
|             | 25                                    | 28.14                                    | 102.76       | 2.61      |
|             | 60                                    | 62.62                                    | 101.16       | 2.64      |
|             | 90                                    | 92.57                                    | 100.14       | 2.76      |
| Well water  | 0                                     | not found                                | -            | 3.29      |
|             | 25                                    | 25.01                                    | 100.04       | 3.38      |
|             | 60                                    | 59.65                                    | 99.41        | 2.94      |
|             | 90                                    | 89.74                                    | 99.71        | 2.19      |

**Table S2.** Comparison of LOD and analytical methods for measuring dipicolinic acid

| Active material             | Method                                                      | Assay time | Linear range ( $\mu\text{M}$ ) | Portability | LOD                | Reference |
|-----------------------------|-------------------------------------------------------------|------------|--------------------------------|-------------|--------------------|-----------|
| RB-Eu-BTC                   | Fluorometric                                                | 16 s       | 0-120                          | No          | 3.20 $\mu\text{M}$ | [1]       |
| CDs-Eu                      | Colorimetric                                                | 15 s       | 0.5-5                          | Yes         | 0.8 nM             | [2]       |
| Eu-MOF                      | Ratiometric fluorescence                                    | -          | 5-50                           | No          | 1.3 $\mu\text{M}$  | [3]       |
| CD-Cu(II)                   | Fluorescence                                                | 20 s       | 0.5-12.5                       | No          | 56 nM              | [4]       |
| Dpy-Bt-COF@Eu <sup>3+</sup> | Fluorescence                                                | 10 s       | 0.1-10                         | No          | 125 nM             | [5]       |
| Eu <sup>3+</sup> /CDs       | Ratiometric Fluorescent                                     | 10 min     | 0–20 $\mu\text{M}$             | No          | 1.18 $\mu\text{M}$ | [6]       |
| Fe-MIL-88NH <sub>2</sub>    | Fluorometric/ Colorimetric                                  | 50 min     | 5–25 $\mu\text{M}$             | No          | 3.00 $\mu\text{M}$ | [7]       |
| Er-BTC/r-QCNSs/MIP          | Visual fluorescence test strip<br>(fluorimeter/colorimeter) | 60 s       | 50-125                         | Yes         | 1.28 $\mu\text{M}$ | This work |

## References

1. Lin, C. and F. Zhigang, *Modifying luminescent metal-organic frameworks with rhodamine dye: Aiming at the optical sensing of anthrax biomarker dipicolinic acid*. *Inorganica Chimica Acta*, 2018. **477**: p. 51-58.
2. Wang, J., et al., *An europium functionalized carbon dot-based fluorescence test paper for visual and quantitative point-of-care testing of anthrax biomarker*. *Talanta*, 2020. **220**: p. 121377.
3. Zhao, X.-Y., et al., *A water-stable europium-MOF sensor for the selective, sensitive ratiometric fluorescence detection of anthrax biomarker*. *Microchemical Journal*, 2021. **166**: p. 106253.
4. Pang, L.-F., et al., *Cu (II)-assisted orange/green dual-emissive carbon dots for the detection and imaging of anthrax biomarker*. *Spectrochimica Acta Part A: Molecular and Biomolecular Spectroscopy*, 2021. **244**: p. 118872.
5. Li, Y.-F., et al., *Colorimetric detection of putrescine and cadaverine in aquatic products based on the mimic enzyme of (Fe, Co) codoped carbon dots*. *Journal of Food Measurement and Characterization*, 2021. **15**(2): p. 1747-1753.
6. Li, X., et al., *A Smartphone Integrated Platform for Ratiometric Fluorescent Sensitive and Selective Determination of Dipicolinic Acid*. *Biosensors*, 2022. **12**(8): p. 668.
7. Deng, D., et al., *Dual-mode strategy for 2, 6-dipicolinic acid detection based on the fluorescence property and peroxidase-like activity inhibition of Fe-MIL-88NH<sub>2</sub>*. *Spectrochimica Acta Part A: Molecular and Biomolecular Spectroscopy*, 2023: p. 122363.
